# Supplementary material for: Bio-doping of regenerated silk fibroin solution and films: a green route for biomanufacturing
Source: Royal Society of Chemistry journal article supplement (doi:10.1039/c4ra04622f), 2014-01-01
Supplement: c4ra04622f1.pdf [file c4ra04622f1.pdf]

## **SUPPLEMENTARY INFORMATION** Bio-doping of regenerated silk fibroin

### solution and films: a green route for biomanufacturing

A. Sagnella,<sup>†a</sup> C. Chicco<sup>†b</sup>, N. Di Virgilio<sup>b\*</sup>, S. Toffanin<sup>c</sup>, T. Posati<sup>a</sup>, A. Pistone<sup>d</sup>, S. Bonetti<sup>c</sup>, M. Muccini<sup>c</sup>, G. Ruani<sup>c\*</sup>, V. Benfenati<sup>d\*</sup>, F. Rossi<sup>b</sup> and R. Zamboni<sup>d</sup>.

### Supplementary Informations

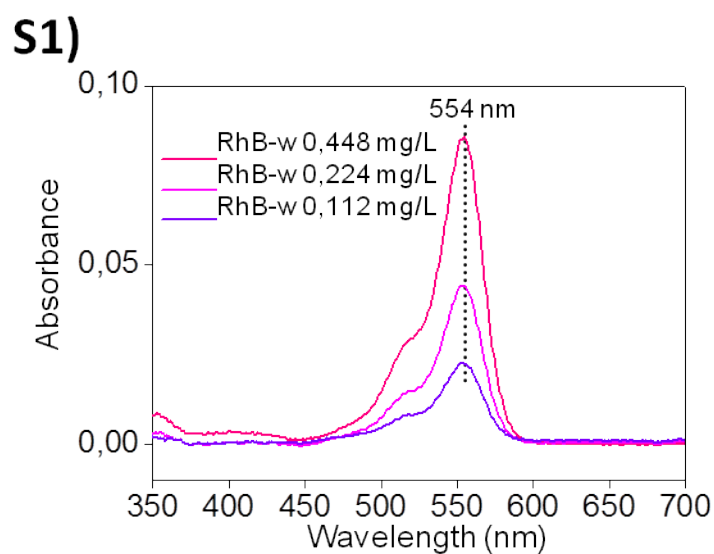

**Figure S1** UV-VIS absorption spectra of RhB dissolved in water at different concentrations of dye (0,448; 0,224; 0,112 mg/L).

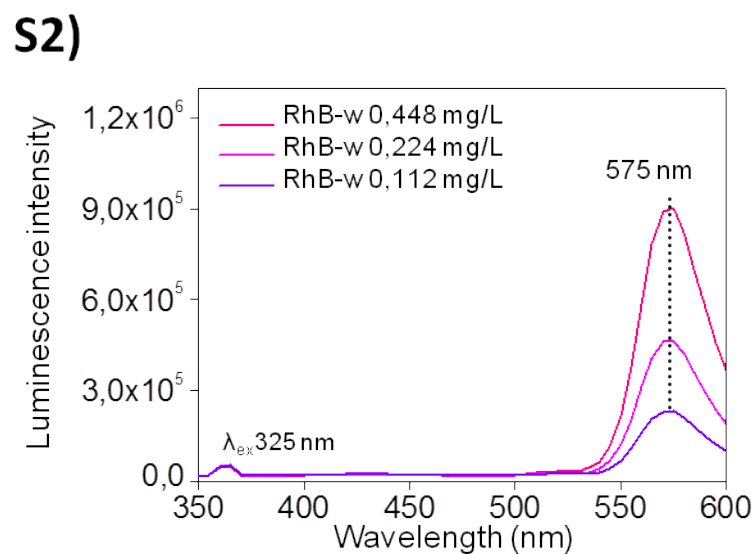

**Figure S2** Emission profiles recorded by exciting at 325 nm RhB dissolved in water.

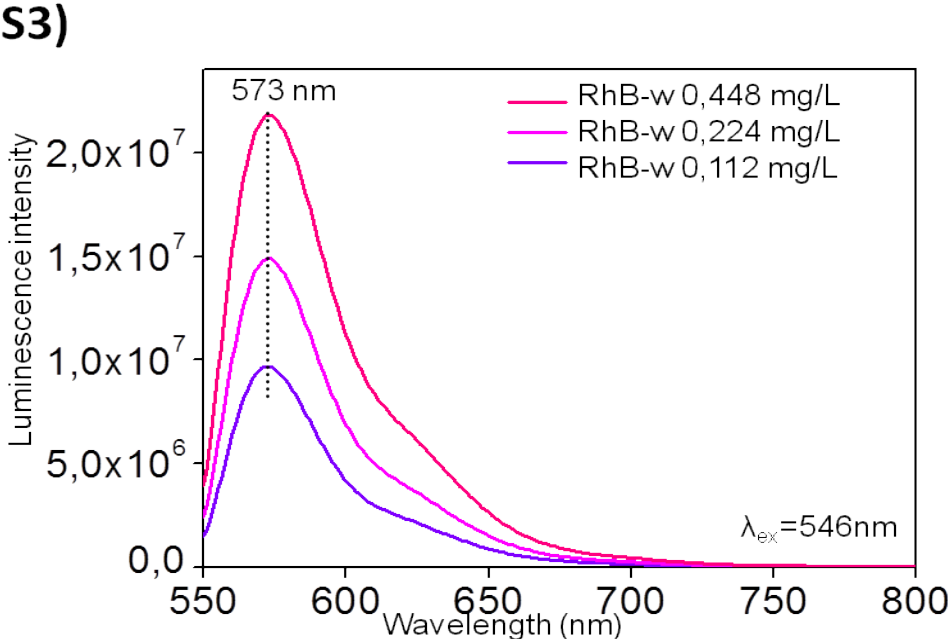

**Figure S3** Emission profiles recorded by exciting at 325 nm RhB dissolved in water.
